# Supplementary material
Source: publisher figshare collection journal article supplement (https://acs.figshare.com/ndownloader/files/18254102)

# Base catalysed bio-diesel - batch

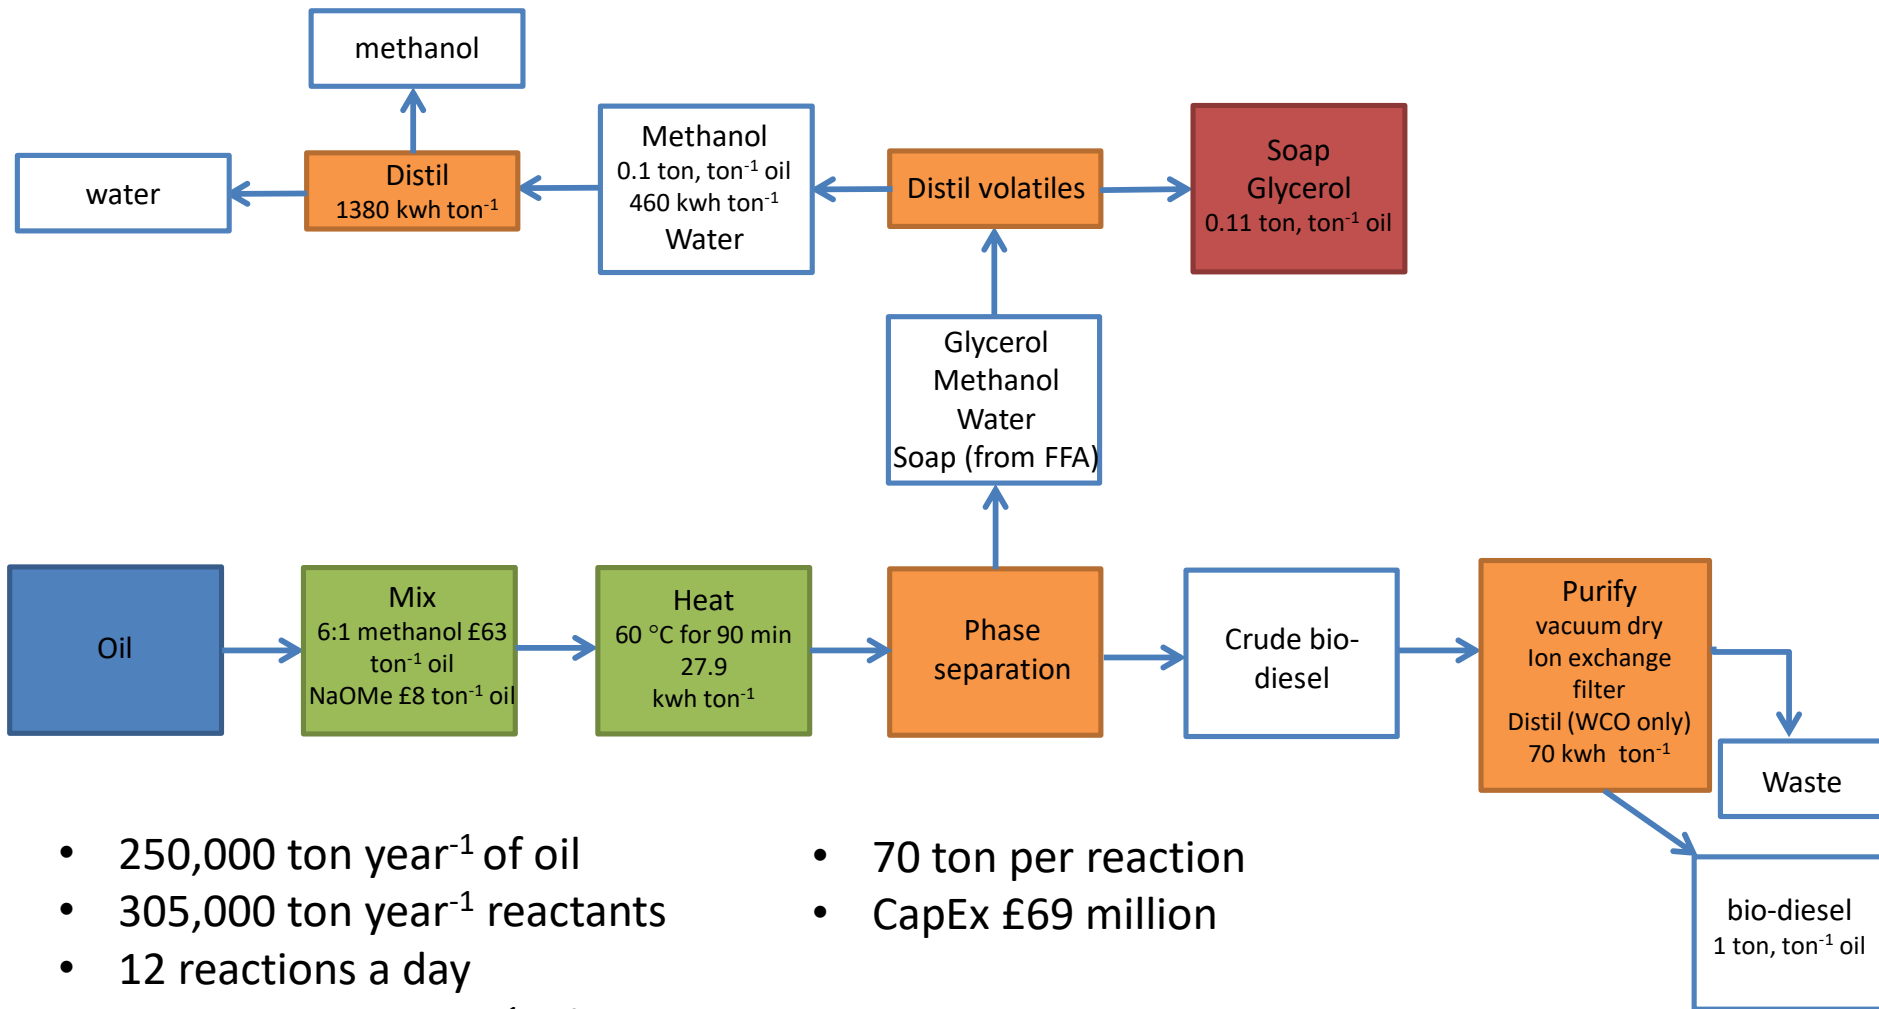

- 250,000 ton year<sup>-1</sup> of oil
- 305,000 ton year<sup>-1</sup> reactants
- 12 reactions a day
- 0.21 ton MeOH ton<sup>-1</sup> oil

- 70 ton per reaction
- CapEx £69 million

# Acid catalysed bio-diesel - batch

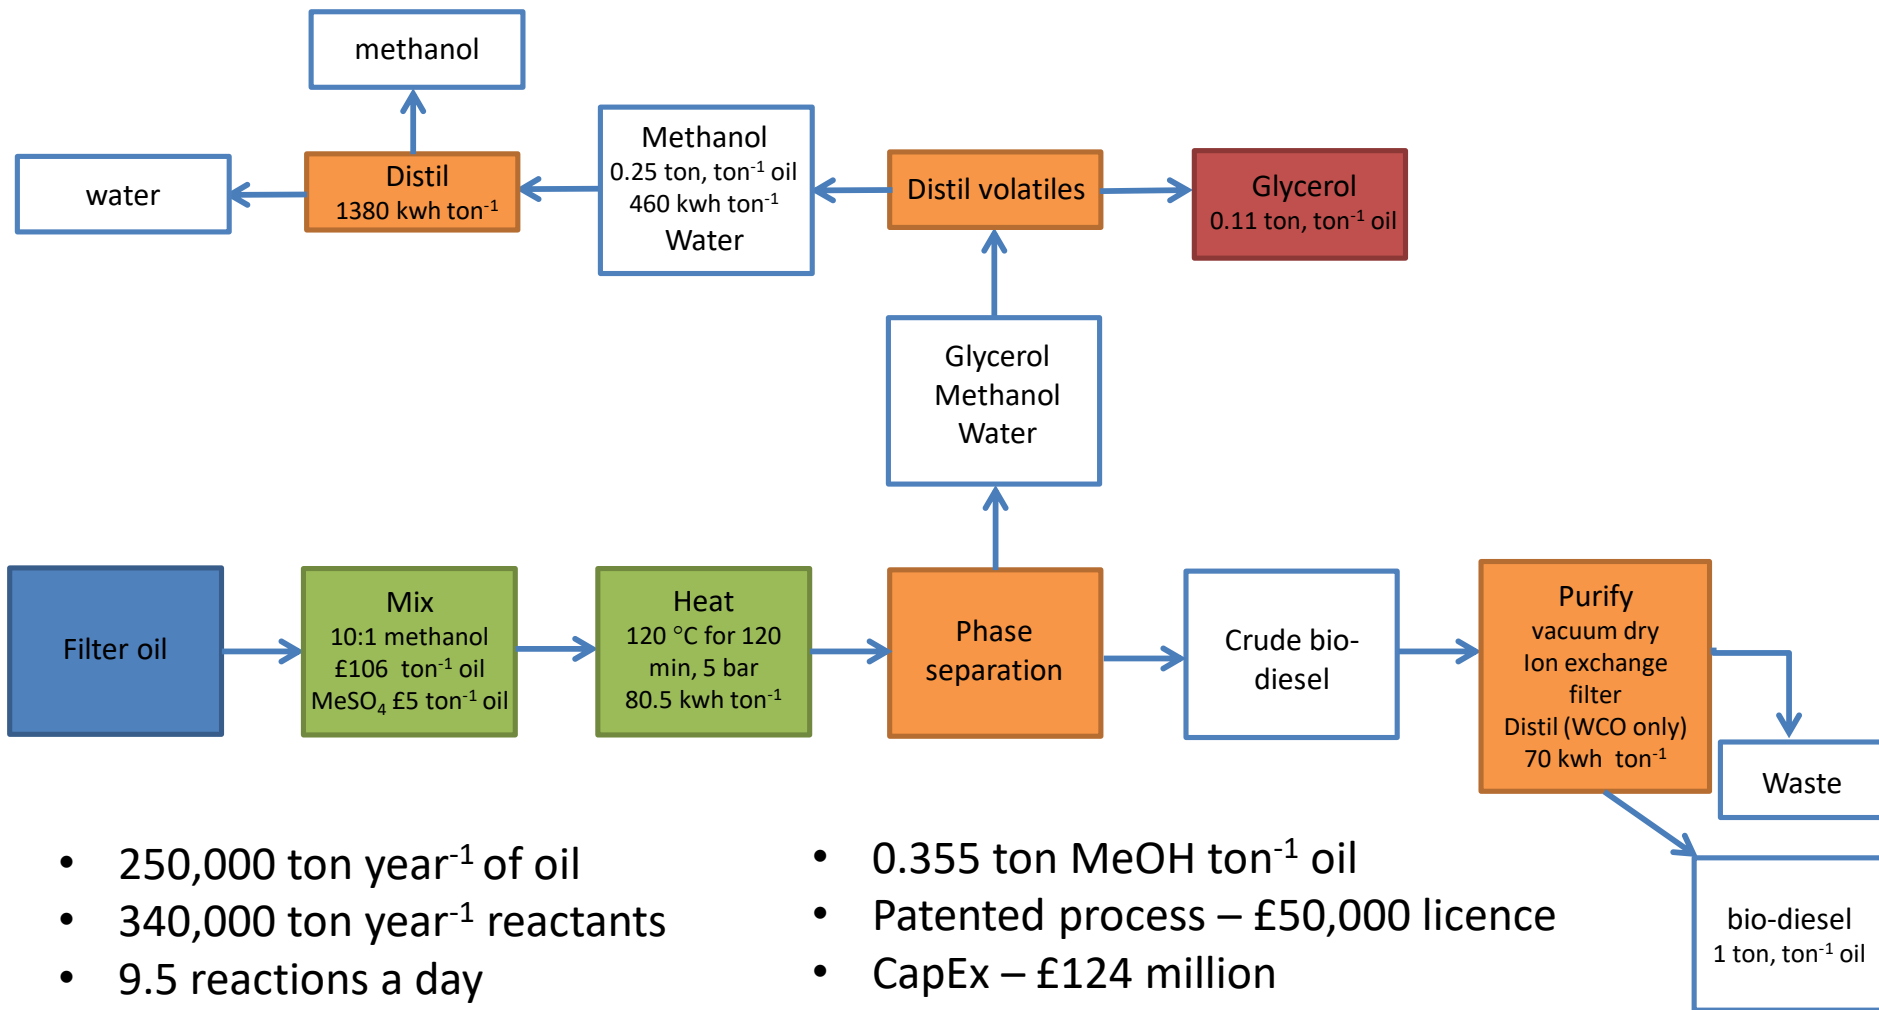

- 250,000 ton year<sup>-1</sup> of oil
- 340,000 ton year<sup>-1</sup> reactants
- 9.5 reactions a day
- 98 ton per reaction

- 0.355 ton MeOH ton<sup>-1</sup> oil
- Patented process – £50,000 licence
- CapEx – £124 million

# Enzymatic catalysed bio-diesel - batch

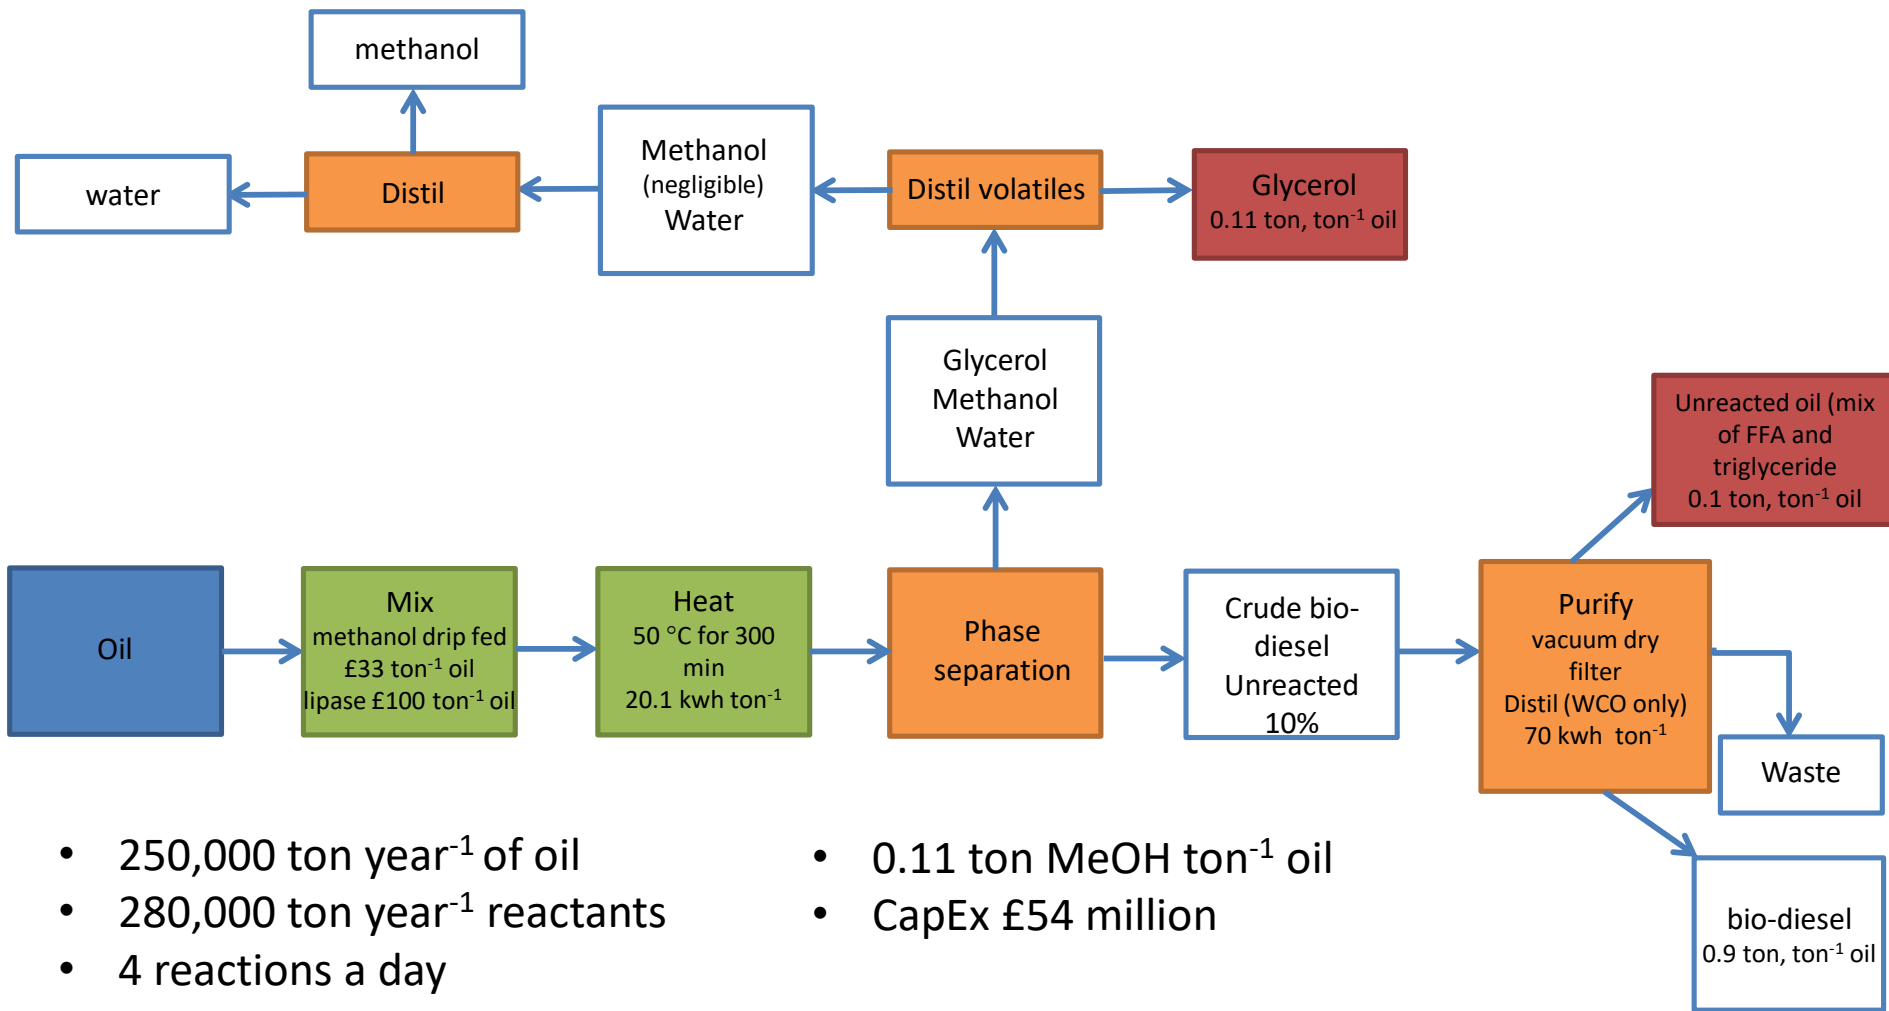

- 250,000 ton year<sup>-1</sup> of oil
- 280,000 ton year<sup>-1</sup> reactants
- 4 reactions a day
- 200 ton per reaction

- 0.11 ton MeOH ton<sup>-1</sup> oil
- CapEx £54 million

# scMeOH bio-diesel - flow

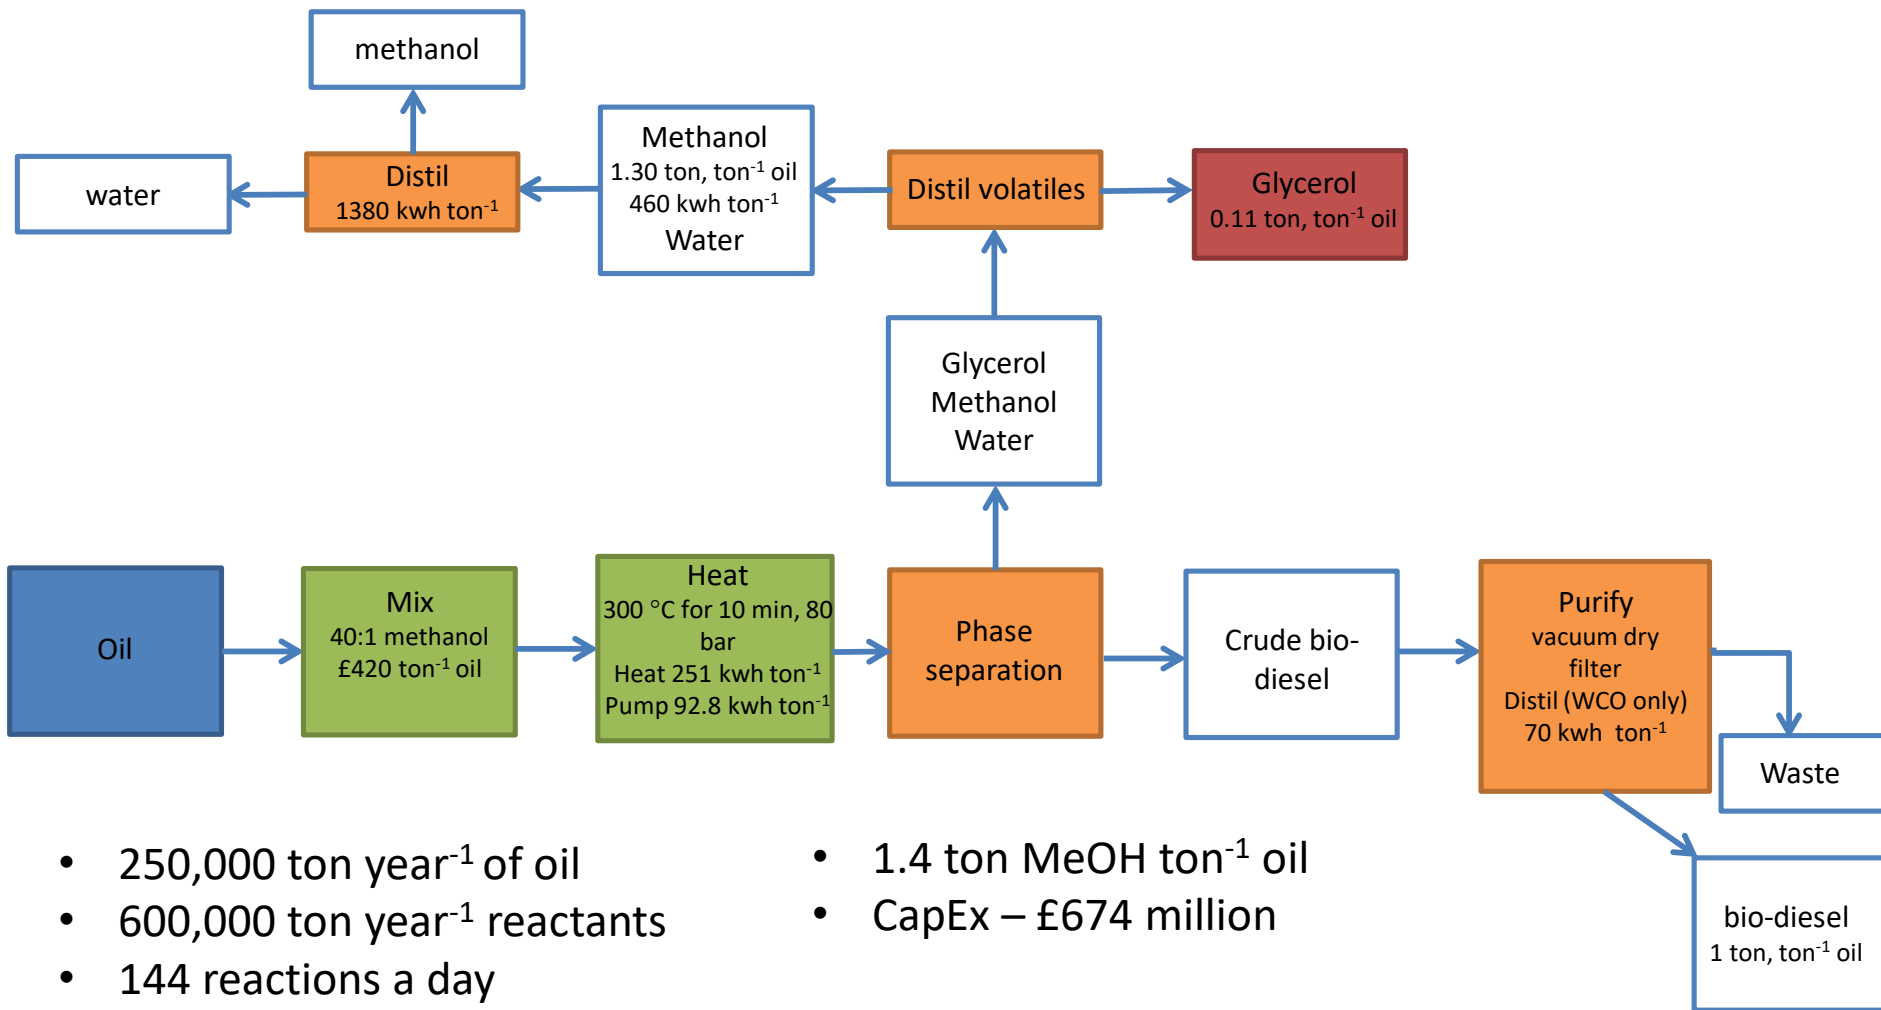

- 250,000 ton year<sup>-1</sup> of oil
- 600,000 ton year<sup>-1</sup> reactants
- 144 reactions a day
- 11.4 ton per reaction

- 1.4 ton MeOH ton<sup>-1</sup> oil
- CapEx – £674 million

# Soap options

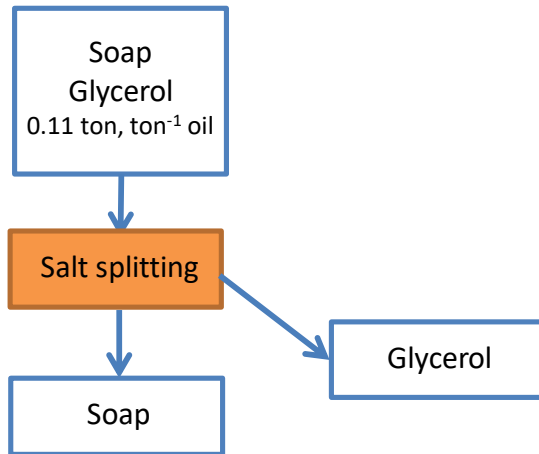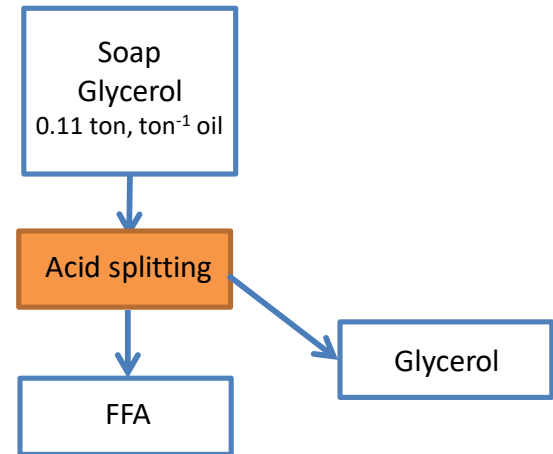

# Glycerol options

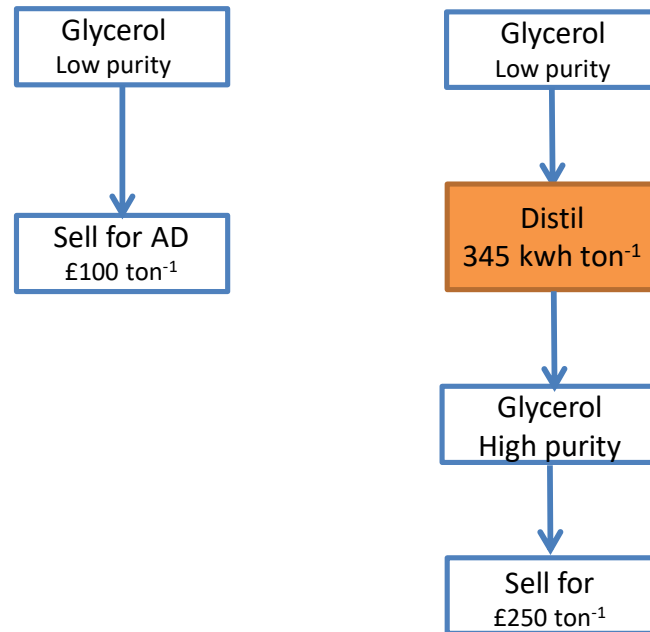

# Oil pre-treatment

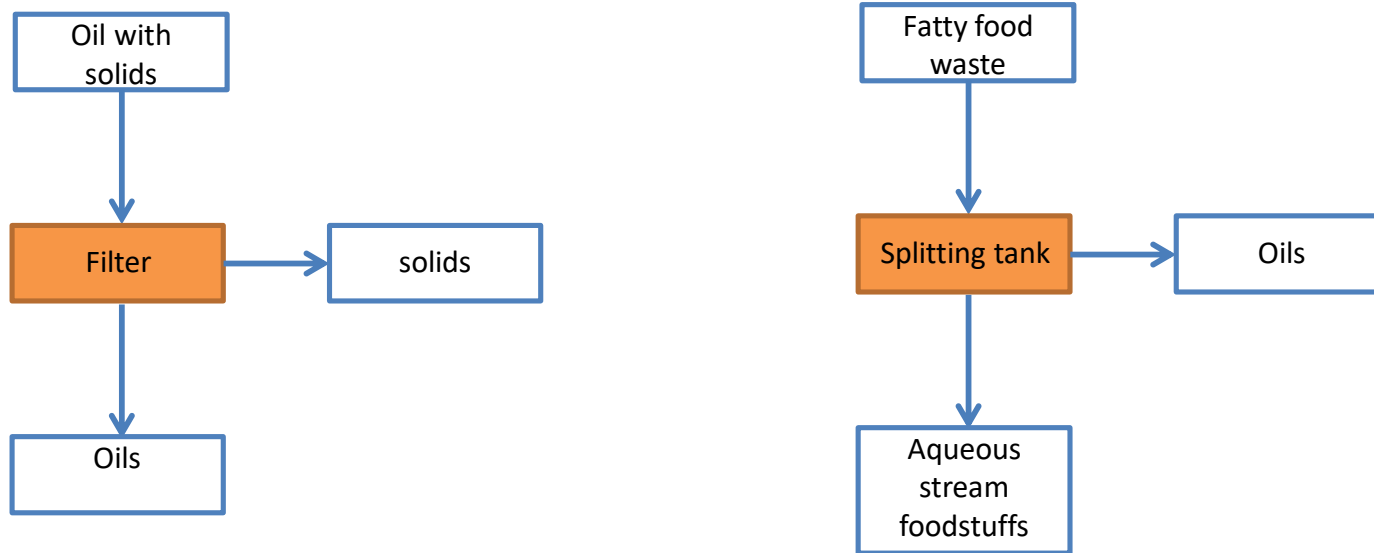

Supplement: Supplementary file 1 [file 18254102]
